# Supplementary material
Source: publisher figshare collection journal article supplement (https://tandf.figshare.com/ndownloader/files/18650681)
Supplement: Supplementary file 1 [file 18650681]

**Supplementary material**

**The mirage water concept and an index-based approach to quantify causes of hydrological changes in semi-arid regions**

Ali Torabi Haghighi *et al.*

**
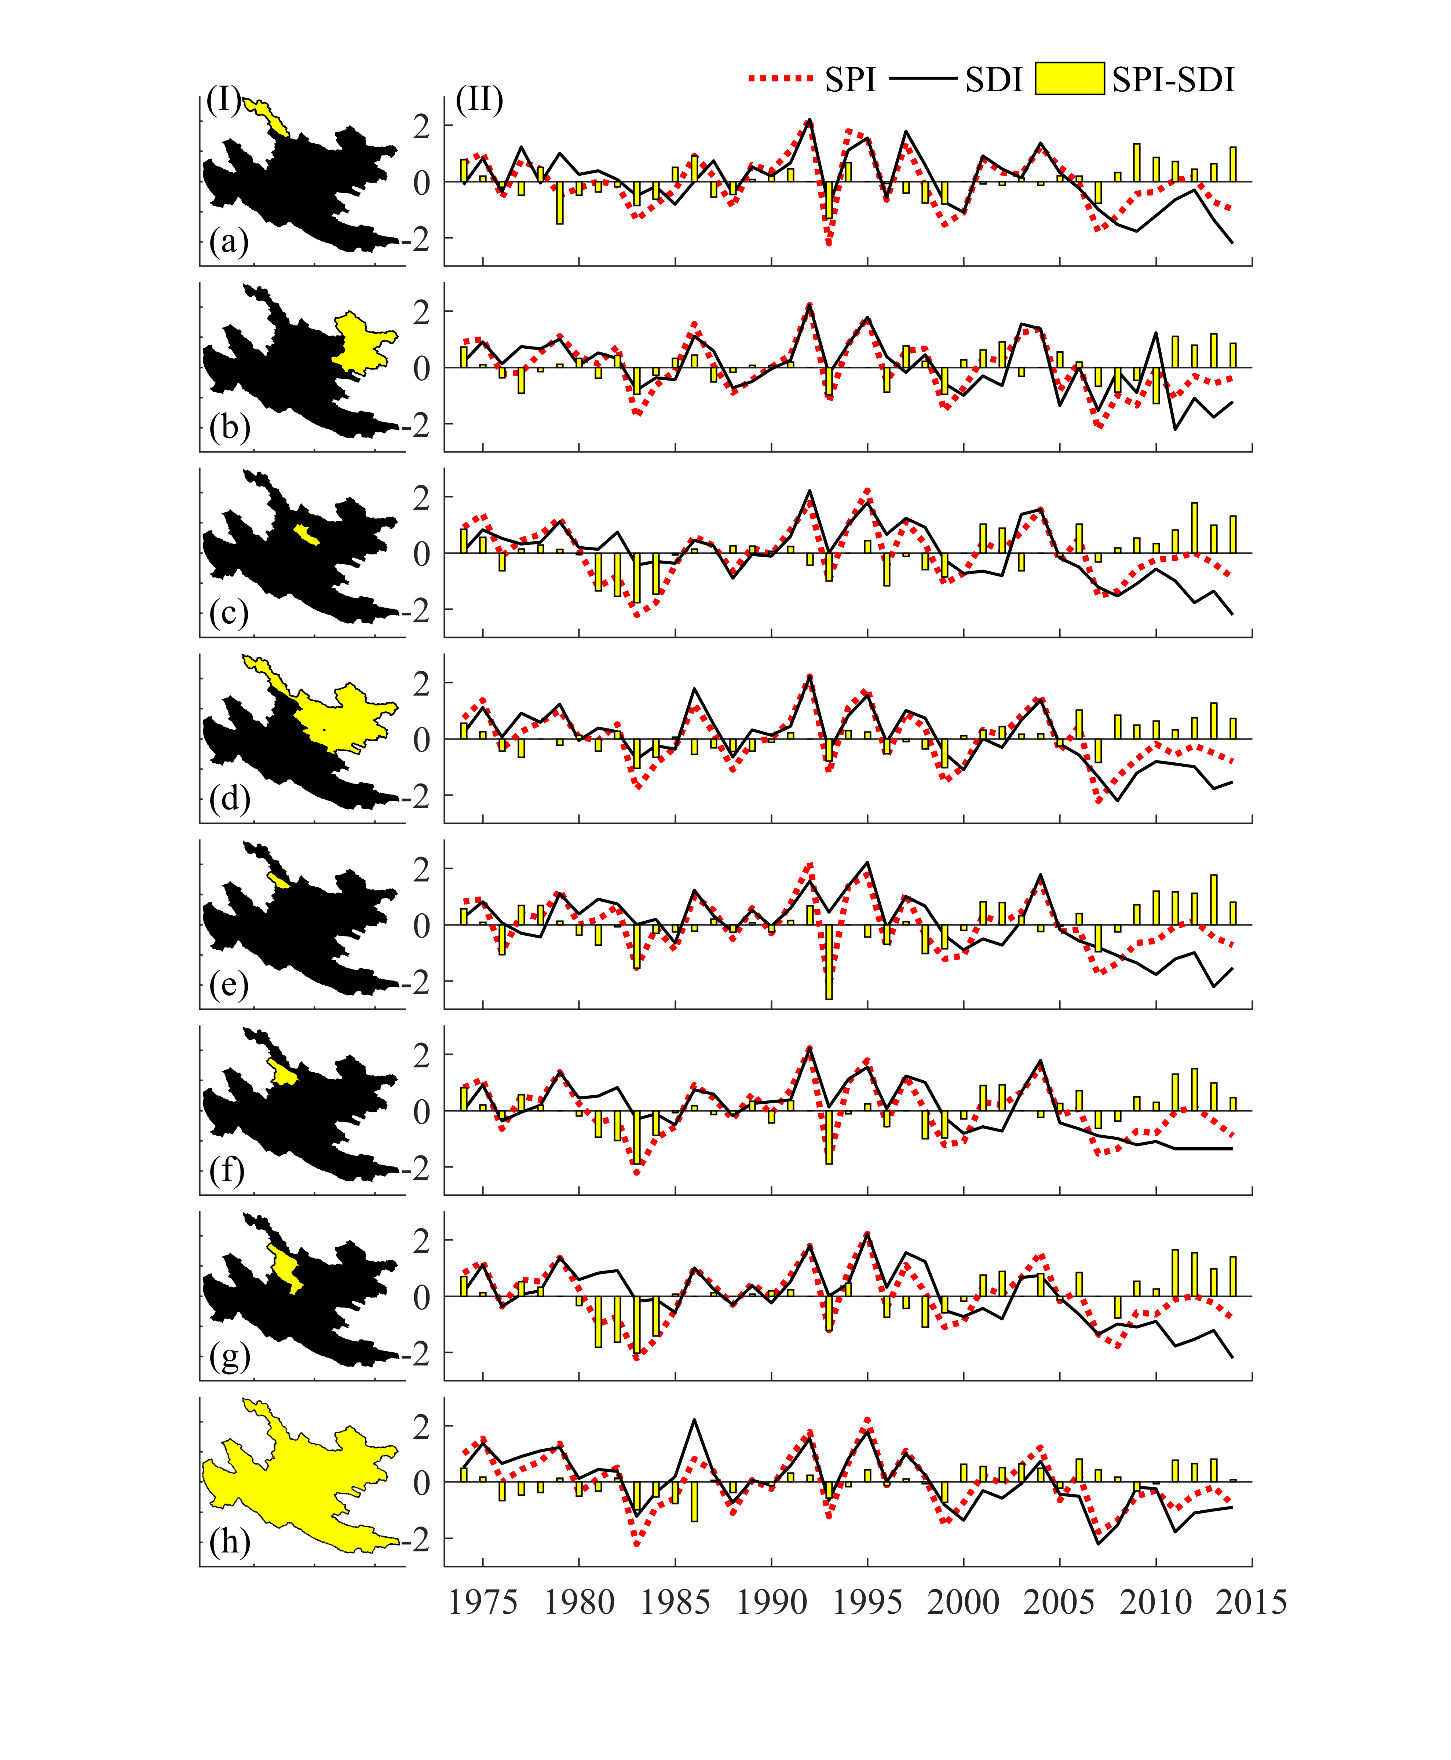
**

**Figure S1.** Measures of spatio-temporal hydrological (SDI) and metrological (SPI) droughts in the Mond River Basin for the period 1974–2014: (a) Bande-Bahman, (b) Hakkan, (c) Barak, (d) Tange-Karzin, (e) Hanifaghan, (f) Tangab, (g) Dehroud and (h) Qantareh gauges. The years are defined based on the Iranian hydrological year, which runs from October to September.


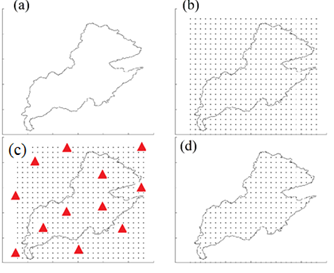


**Figure S2.** Calculating rainfall over the area of sub-basin. Triangles show the location of rainfall stations in this example.

**Table S1.** Names and coordinates of the meteorological stations.

| Station | Longitude | Latitude |
| --- | --- | --- |
| Bahman | 52.57 | 29.28 |
| Karzin | 53.11 | 28.45 |
| Fasa | 53.63 | 28.92 |
| Hanifaghan | 52.55 | 29.10 |
| Tangab | 52.55 | 28.92 |
| Babaarab | 53.77 | 28.58 |
| Dezhgah | 52.40 | 28.21 |
| Jahrom | 53.56 | 28.50 |
| Shonbe | 51.77 | 28.39 |
| Jahanabad | 53.86 | 29.71 |
| Doboneh | 52.78 | 29.42 |
| Qalat | 52.35 | 29.84 |
| Karian | 53.53 | 28.13 |
| Lar | 54.28 | 27.68 |
| Shiraz | 52.28 | 29.70 |
| Govazoon | 54.45 | 28.70 |
| Borghan | 52.02 | 30.22 |
| Farashband | 52.09 | 28.86 |
| Jereh | 51.98 | 29.25 |
| Chiti | 51.30 | 29.58 |
| Dashte-arzhan | 52.00 | 29.66 |
| Bushehr | 50.85 | 28.91 |
| Lamerd | 53.18 | 27.34 |
| Zarindasht | 54.43 | 28.35 |
| Neyriz | 54.30 | 29.18 |
| Rooniz | 53.77 | 29.19 |

**Table S2.** Names and coordinates of the gauge stations at the outlets of the sub-basins in the study area.

| Number | Station | River | Comment |
| --- | --- | --- | --- |
| 1 | Bande-Bahman | Qareaqaj | Headwater and near Kavar Dam |
| 2 | Hakkan | Shoor Jahrom | Headwater |
| 3 | Barak | Simakon | Headwater |
| 4 | Karzin | Mond | Below Salman Farsi Dam |
| 5 | Hanifaghan | Shoor Firouzabad | Headwater |
| 6 | Tangab | Shoor Firouzabad | Below Tangab Dam |
| 7 | Dehroud | Shoor Firouzabad | Haiqer Dam place |
| 8 | Qantareh | Mond | Outlet of the basin |


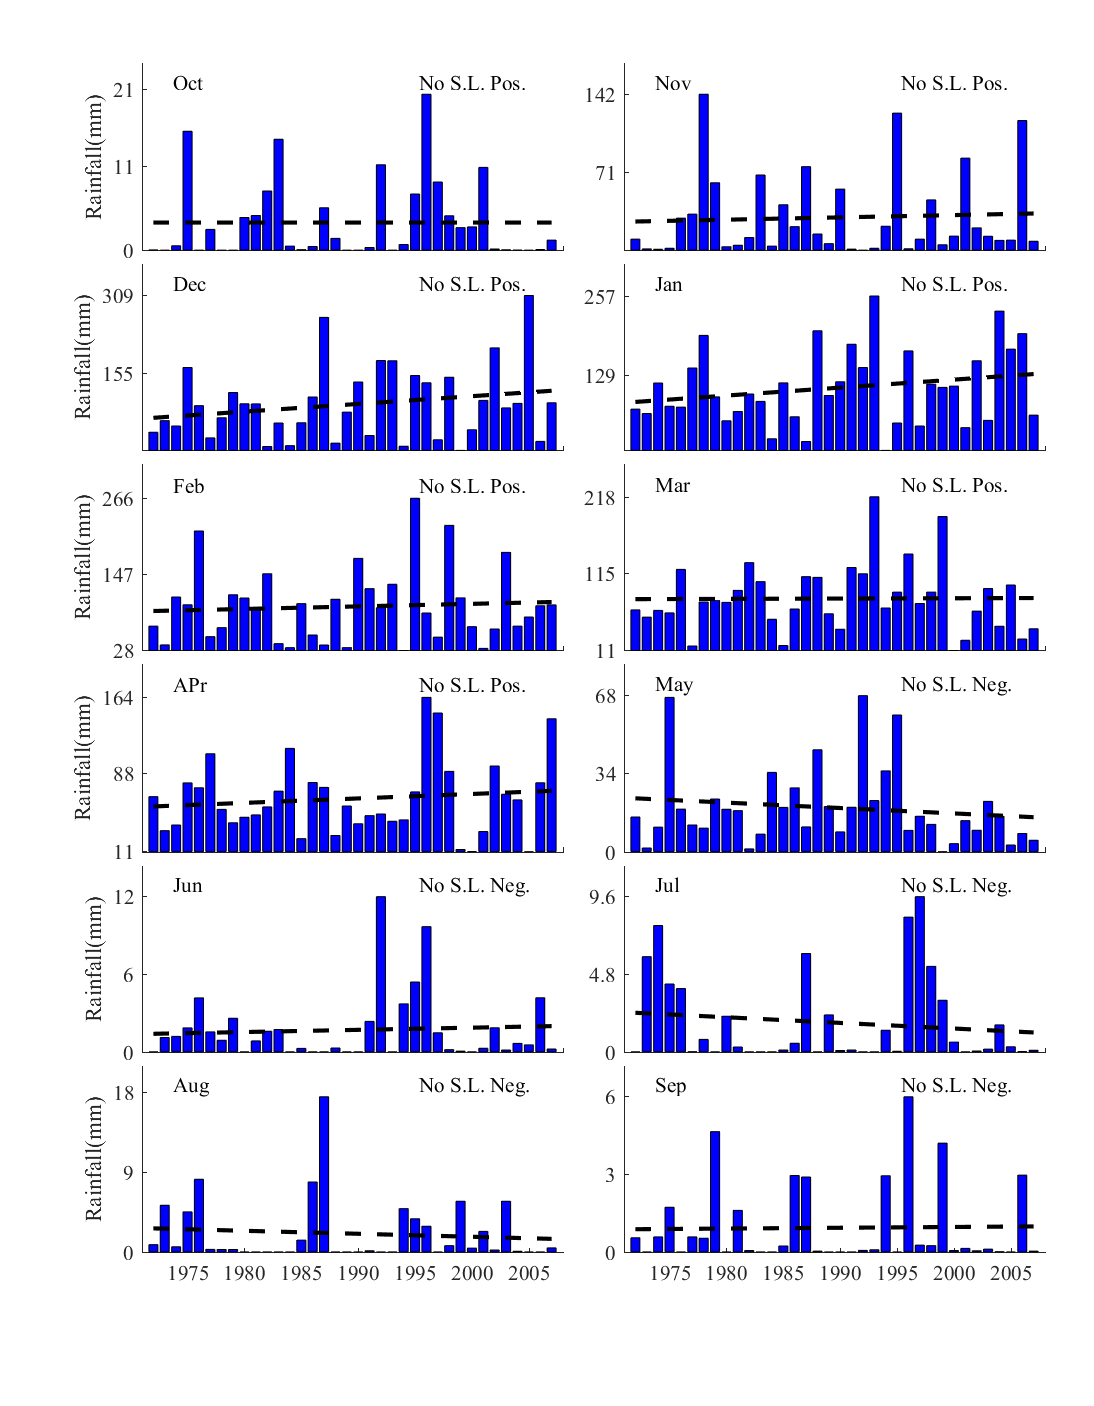


**Figure S3.** Trend of monthly rainfall in Mond River Basin upstream of Bande-Bahman gauge station near Kavar Dam (no. 1 in Table S2).


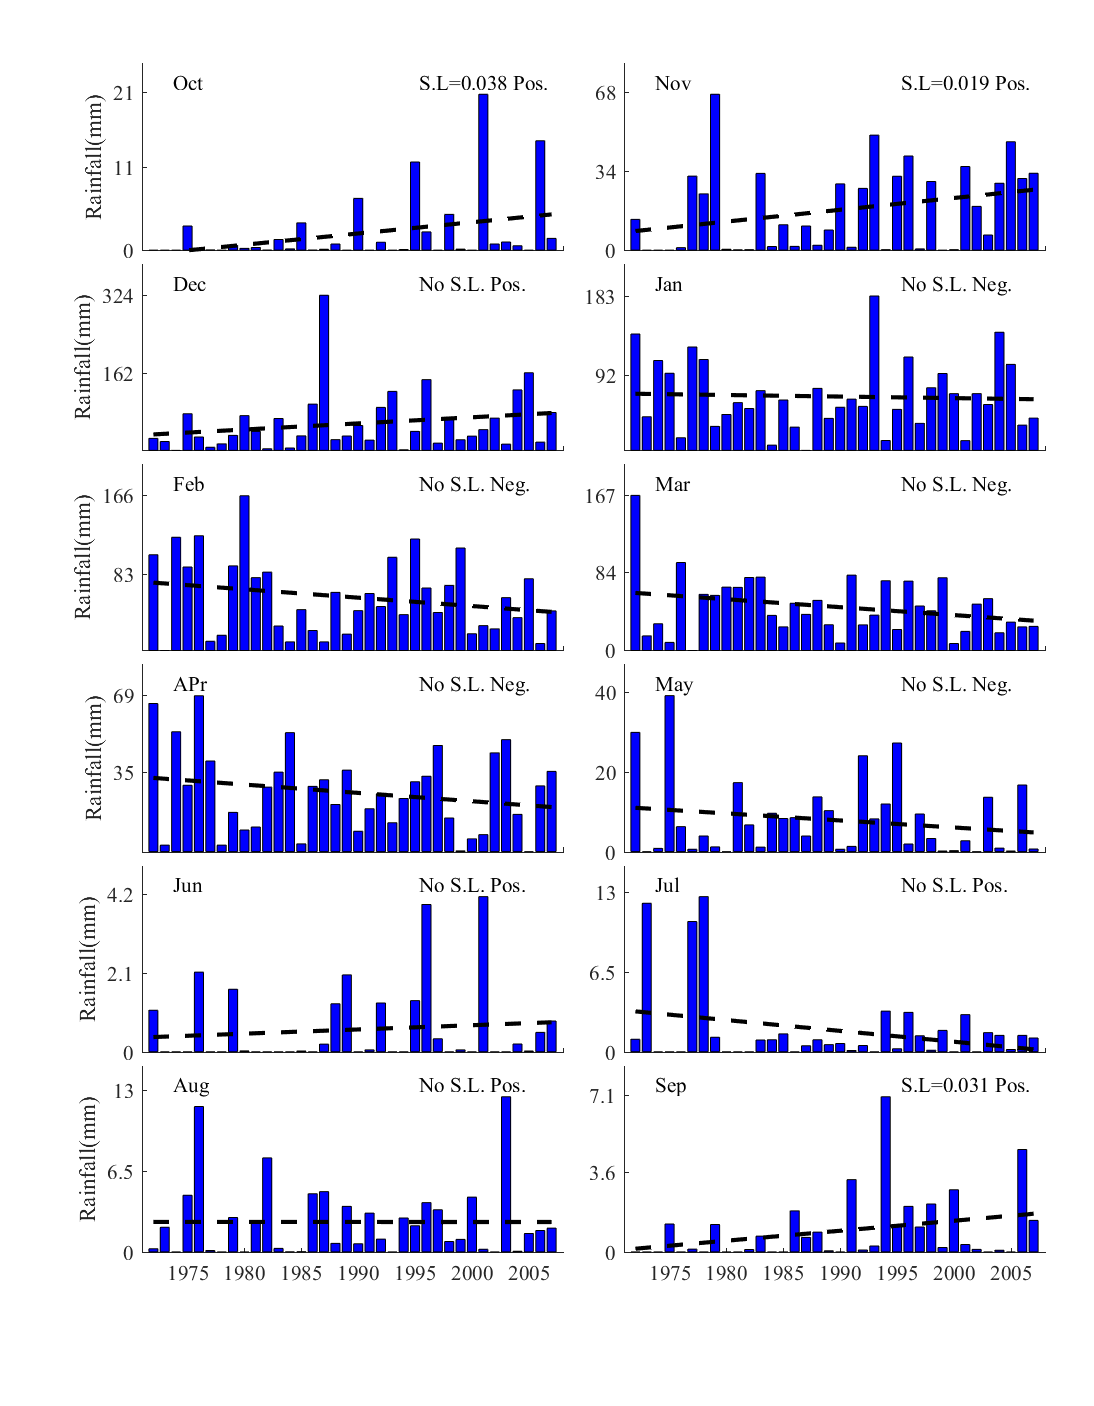


**Figure S4.** Trend of monthly rainfall in the sub-basin upstream of Hakkan gauge station (no. 2 in Table S2).


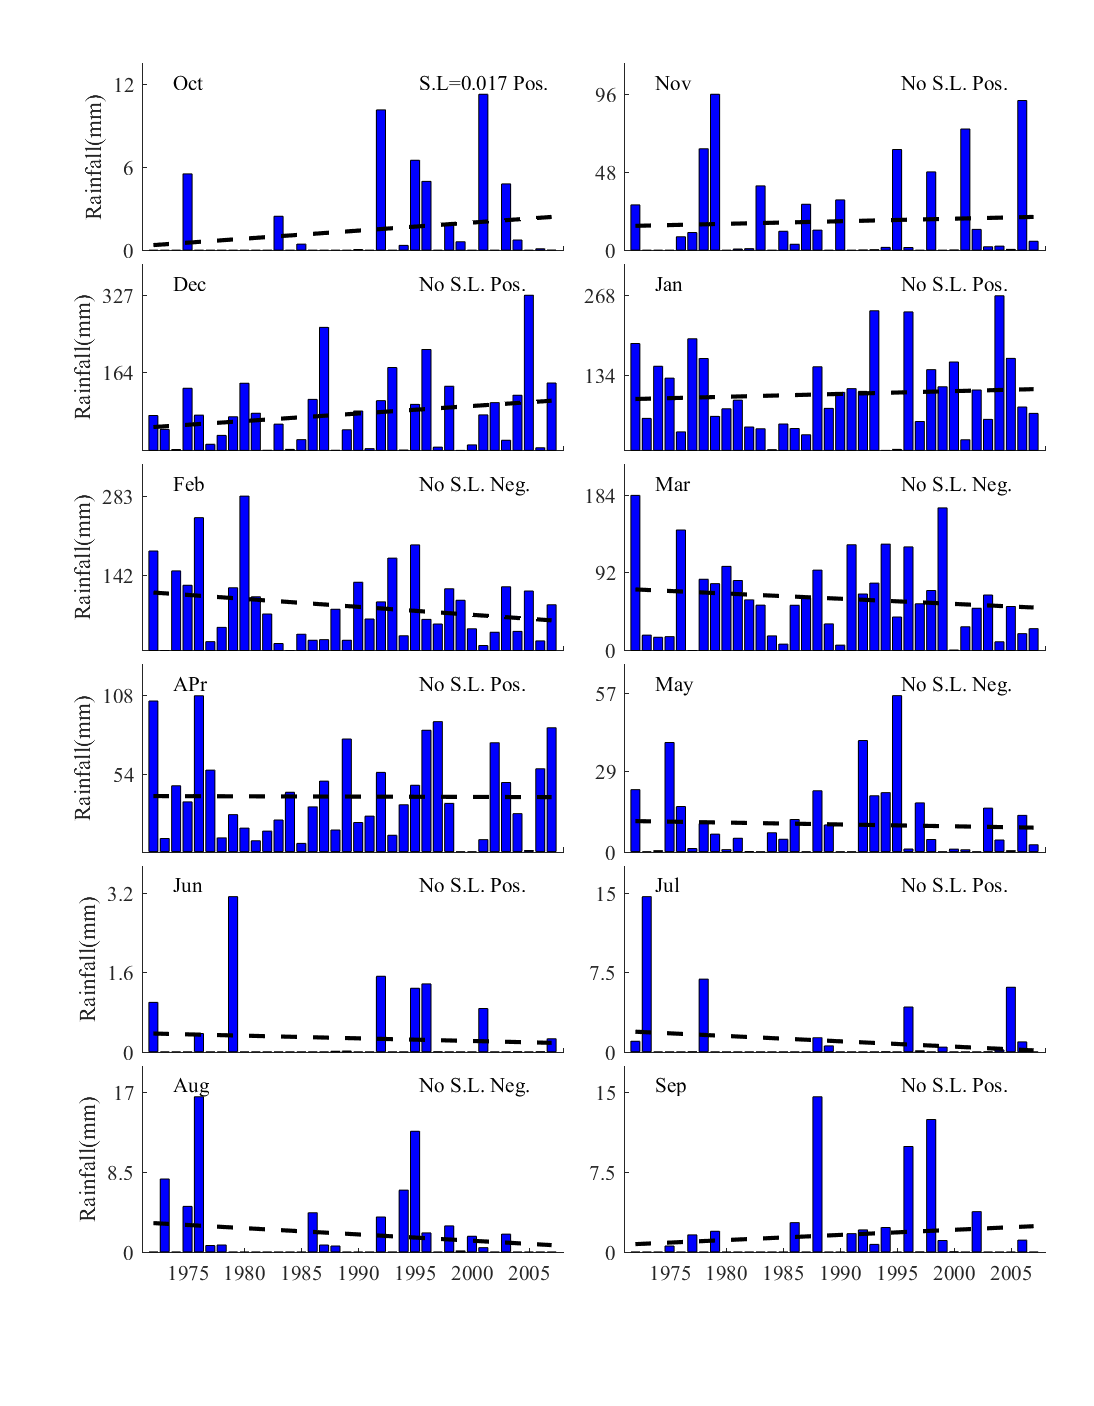


**Figure S5.** Trend of monthly rainfall in the sub-basin upstream of Barak gauge station (no. 3 in Table S2).


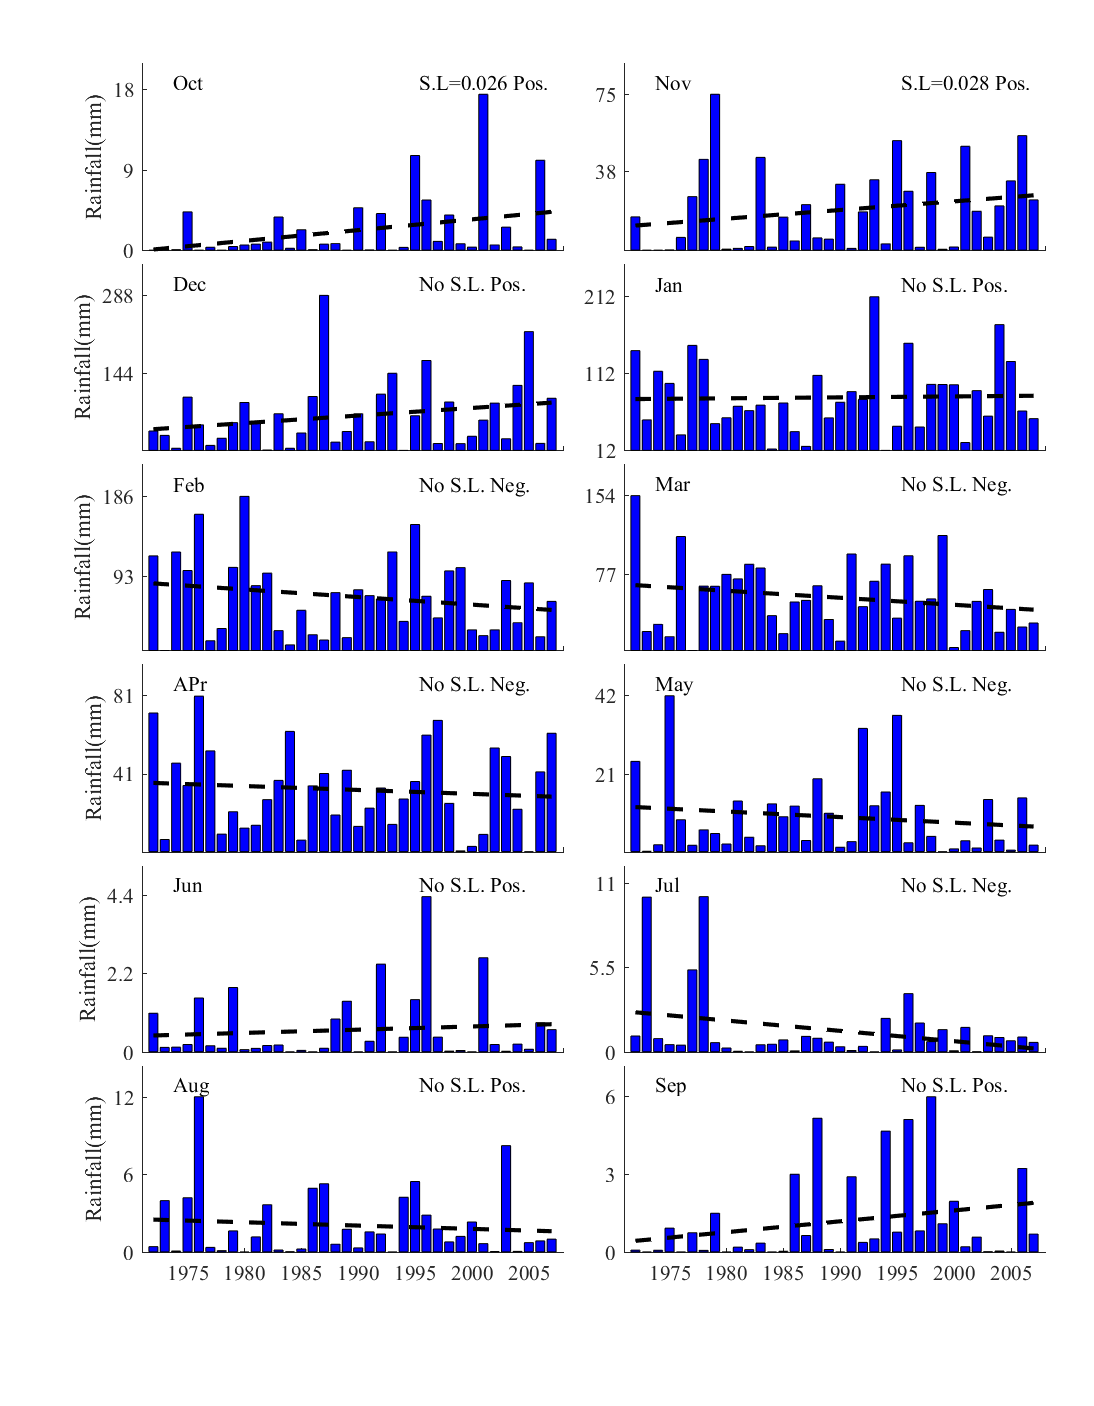


**Figure S6.** Trend of monthly rainfall in the sub-basin upstream of Karzin gauge station (no. 4 in Table S2).


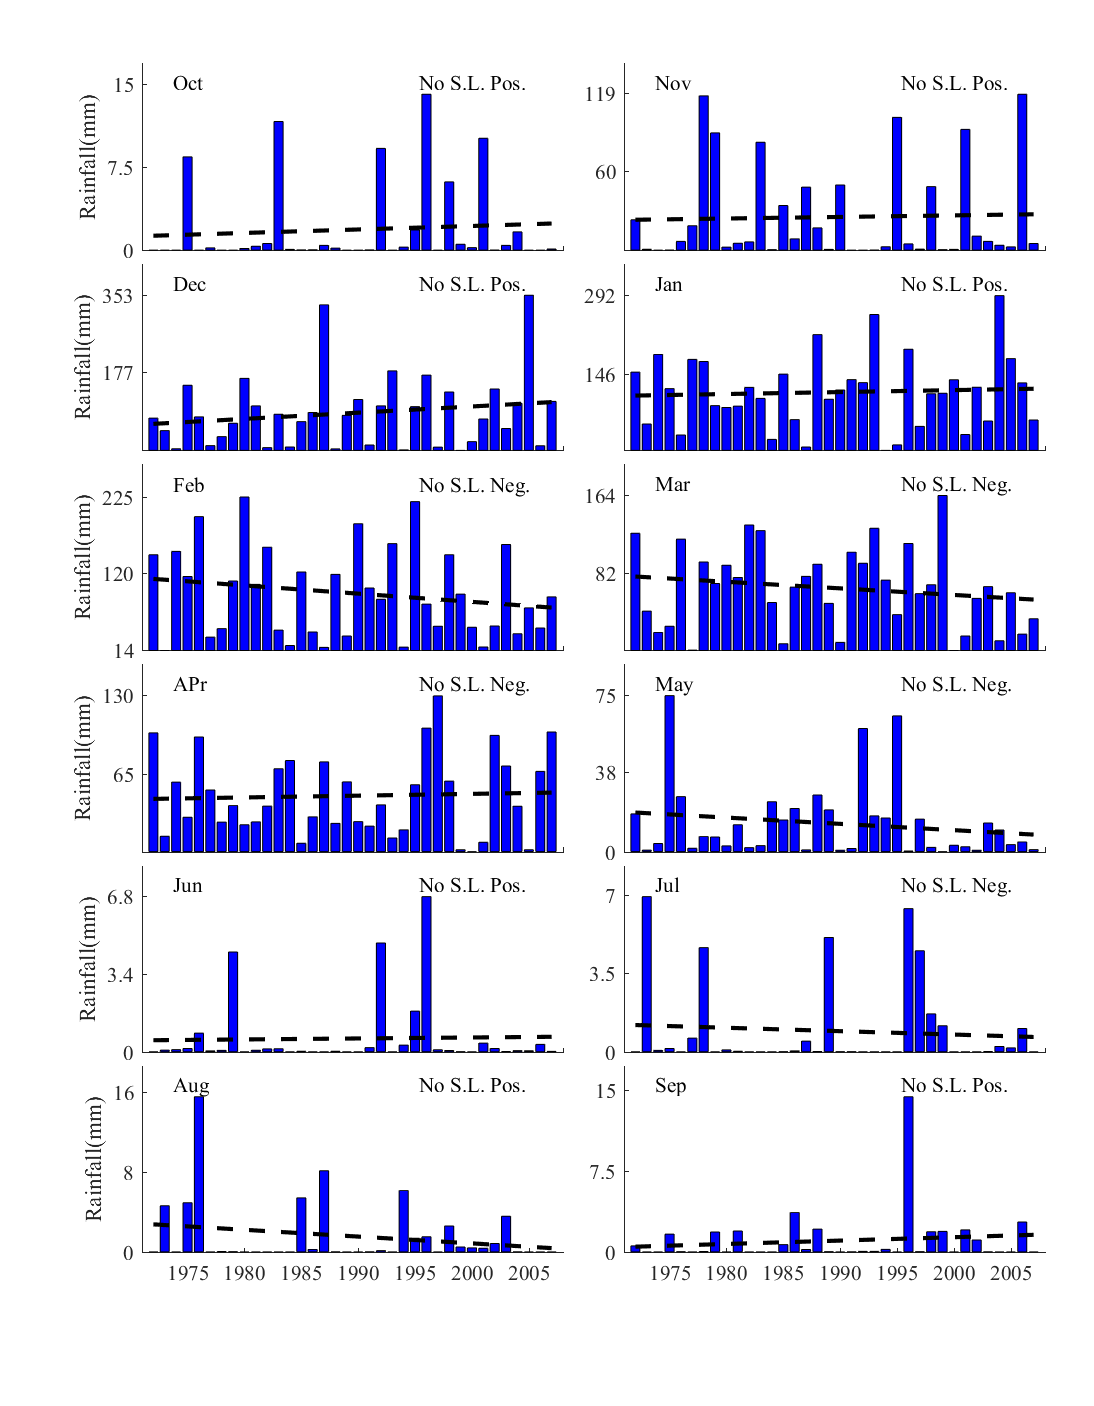


**Figure S7.** Trend of monthly rainfall in the sub-basin upstream of Hanifaghan gauge station (no. 5 in Table S2).


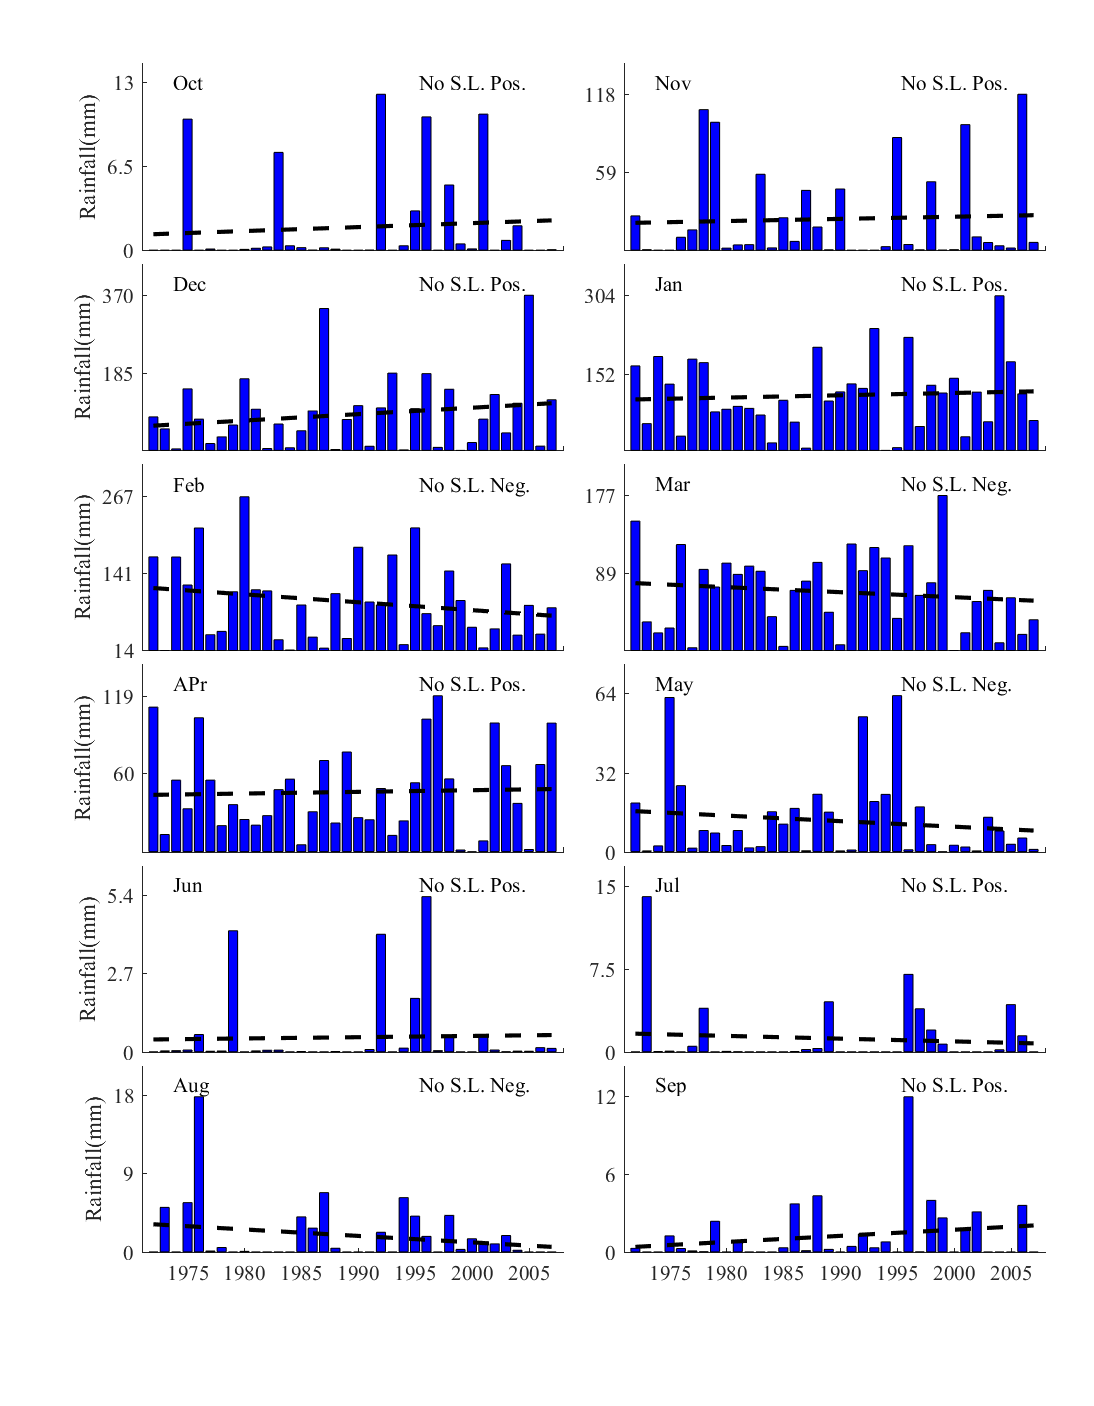


**Figure S8.** Trend of monthly rainfall in the sub-basin upstream of Tangab gauge station (no. 6 in Table S2).


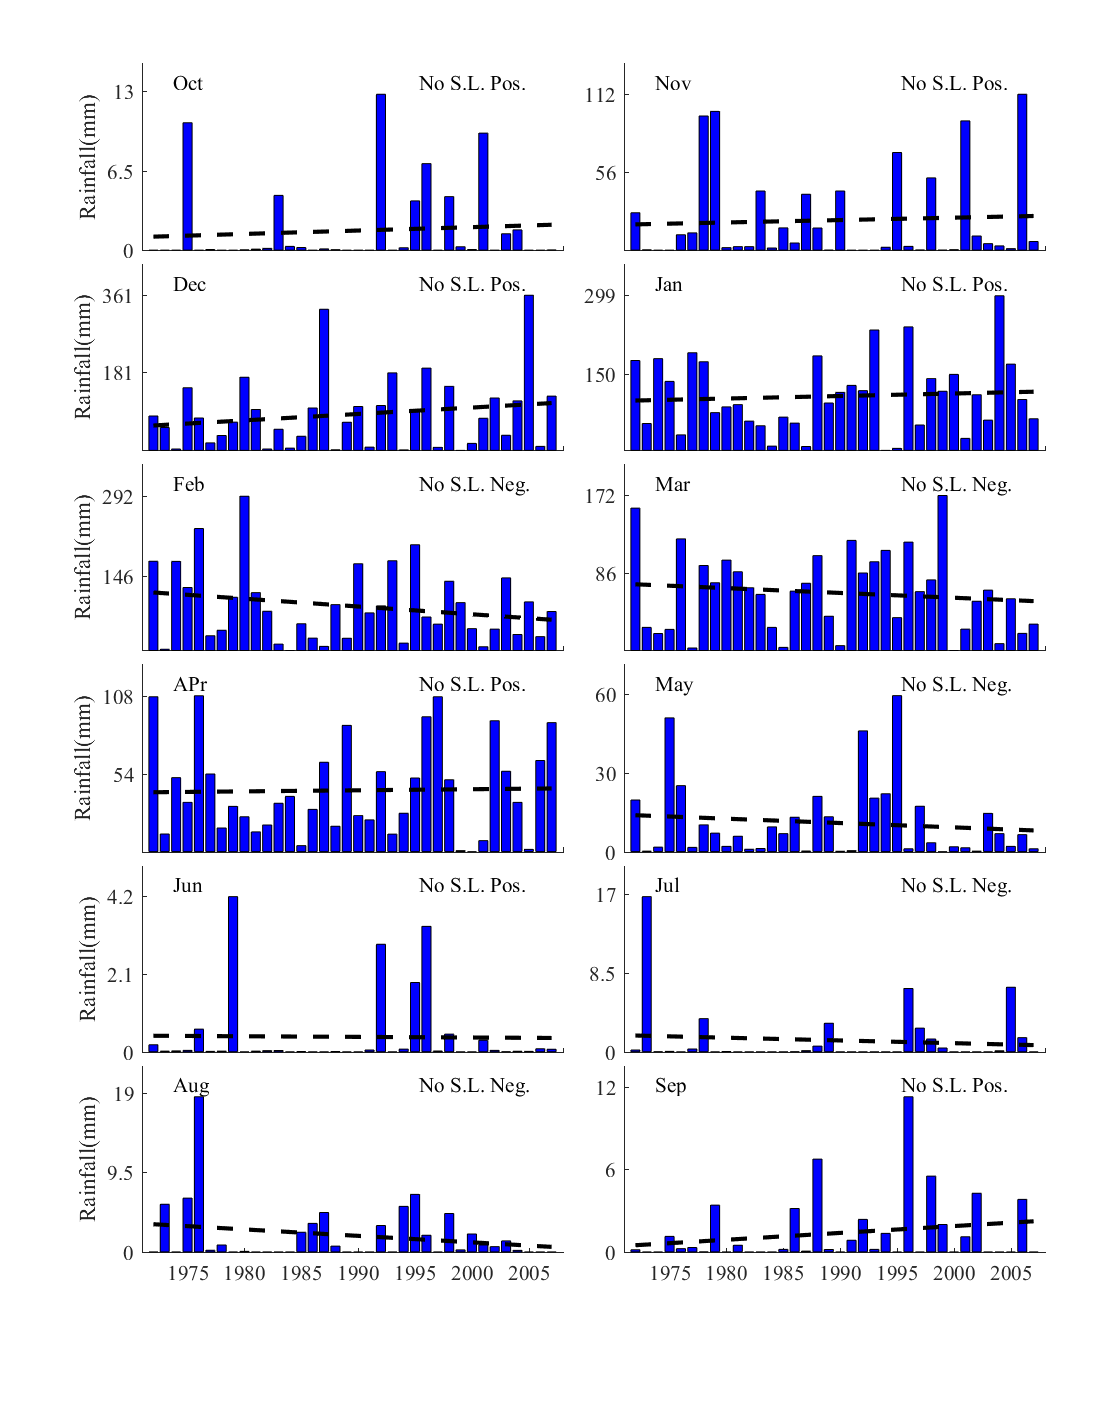


**Figure S9.** Trend of monthly rainfall in the sub-basin upstream of Dehroud gauge station near Haiqer Dam (no. 7 in Table S2).


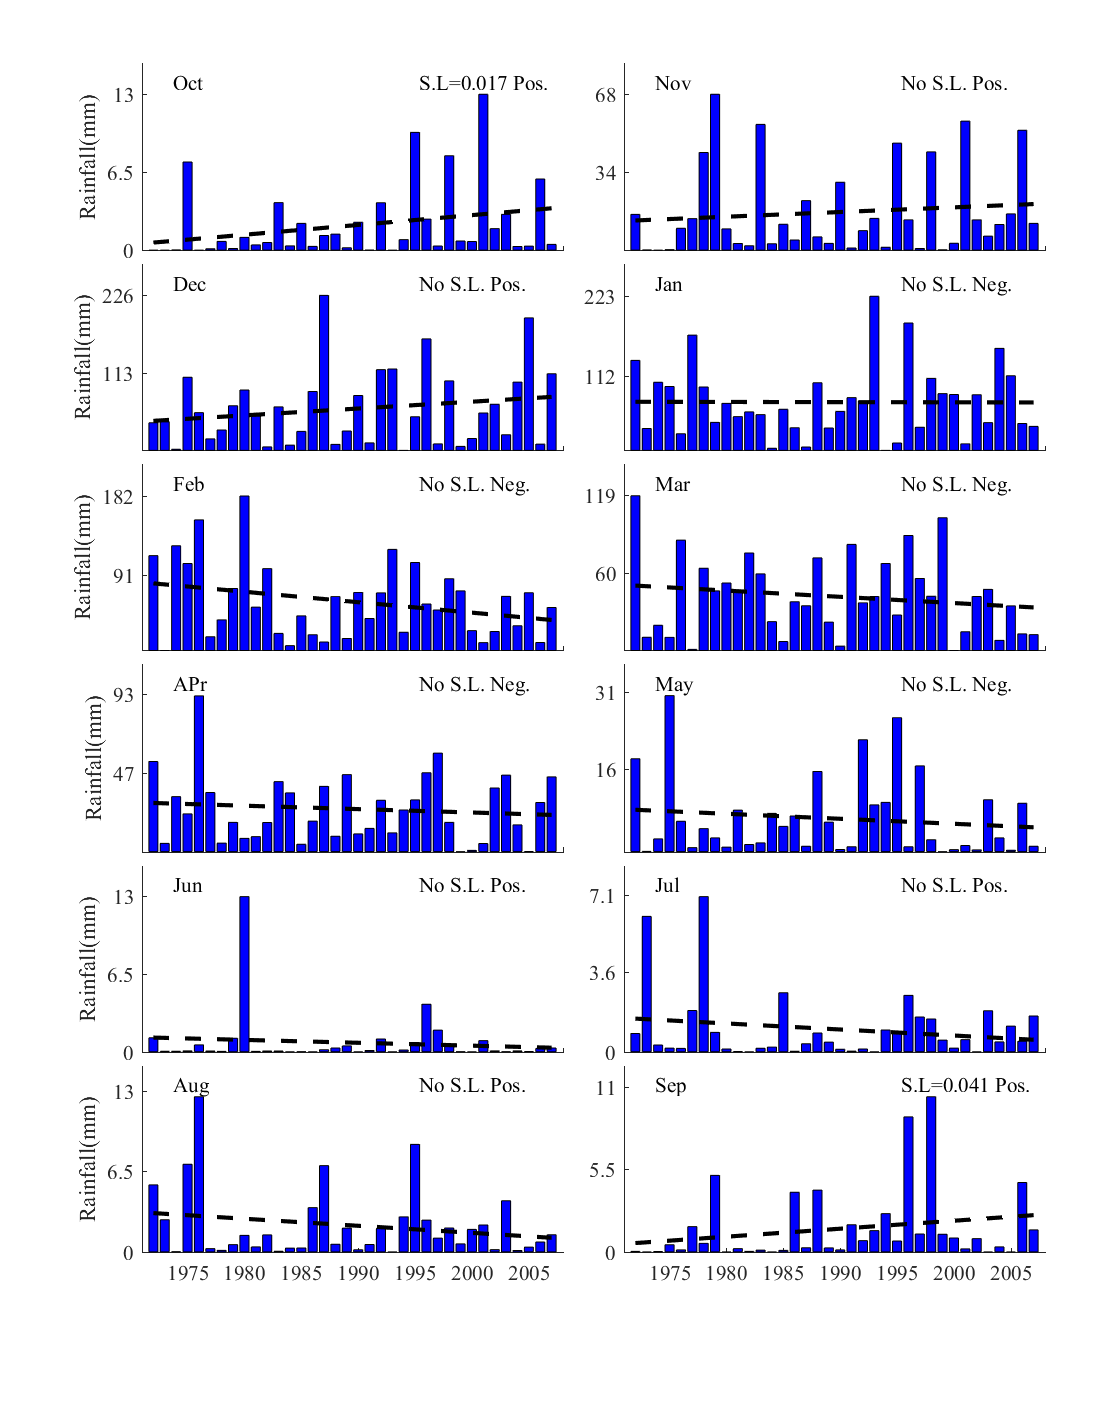


**Figure S10.** Trend of monthly rainfall in Mond River Basin.


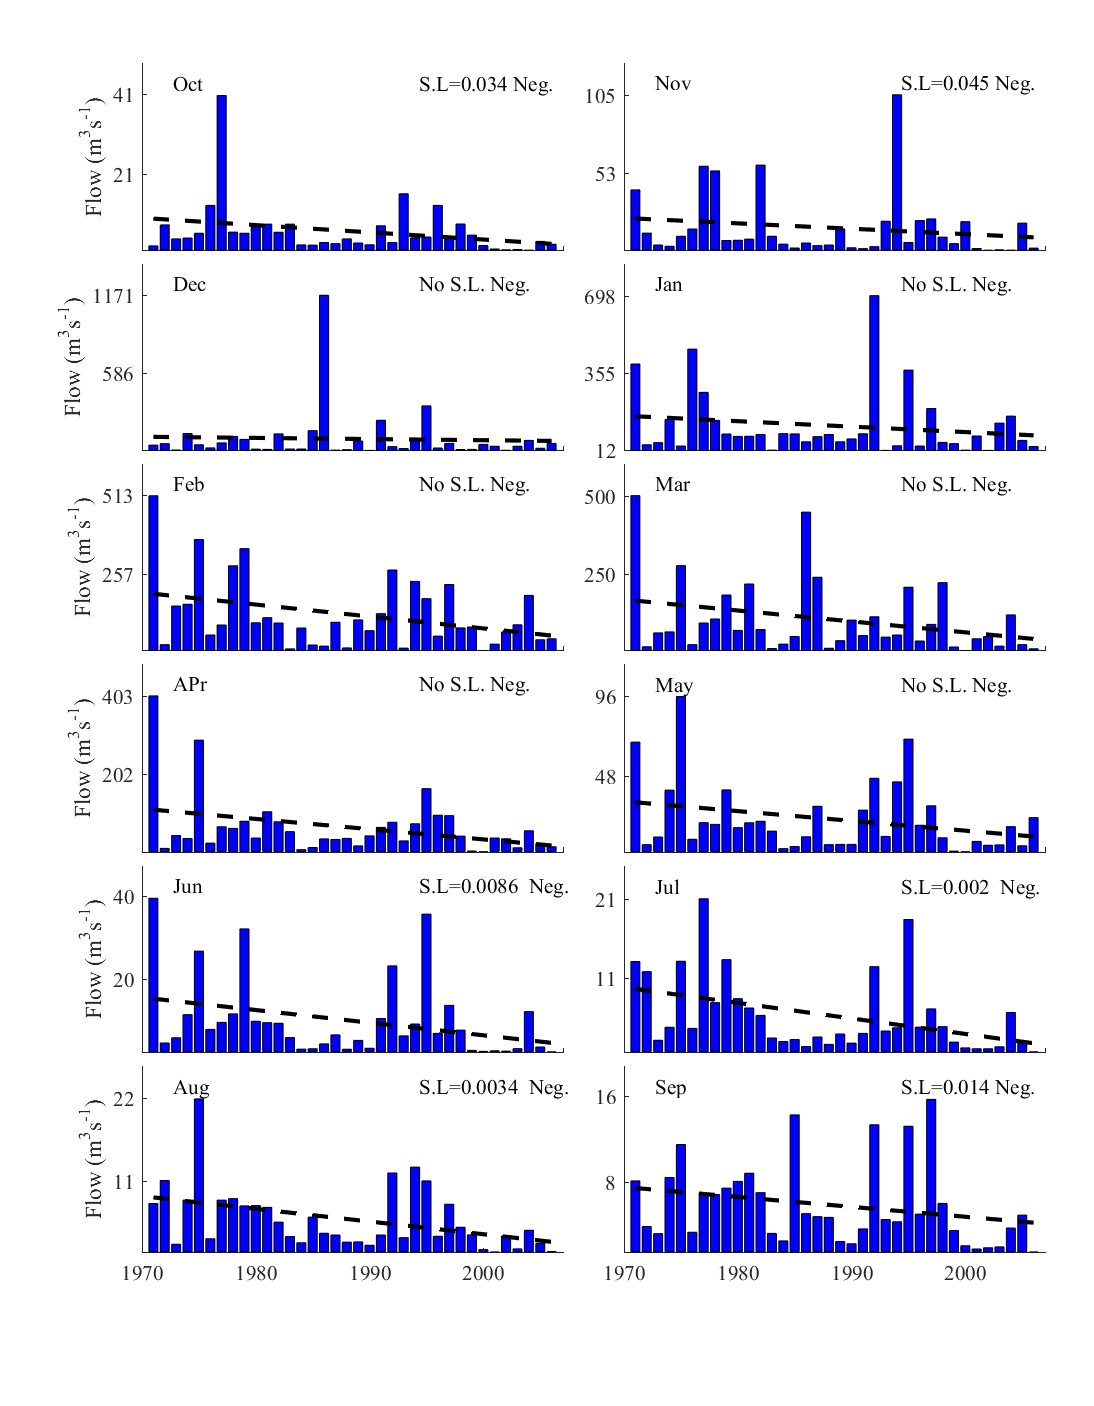


**Figure S11.** Trend of monthly flow at Qantareh gauge station (no. 7 in Table S2).


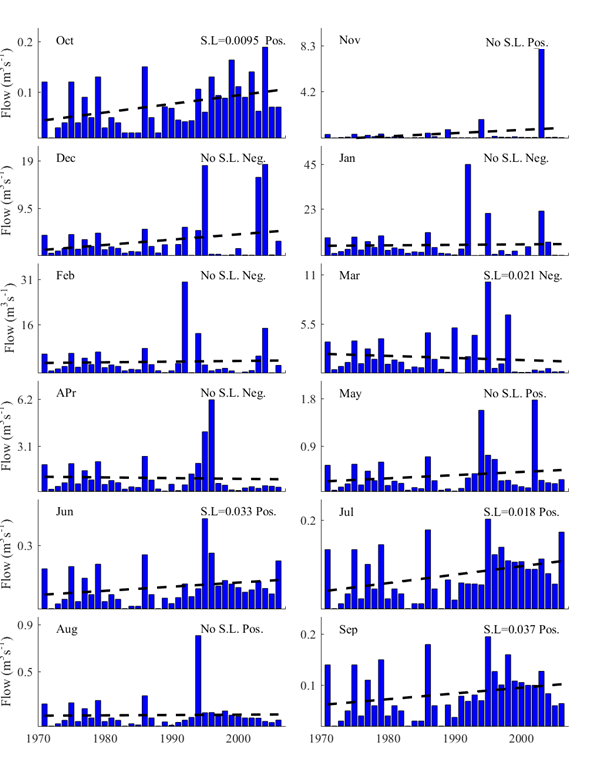


**Figure S12.** Trend of monthly flow at Hakkan gauge station (no. 2 in Table S2).


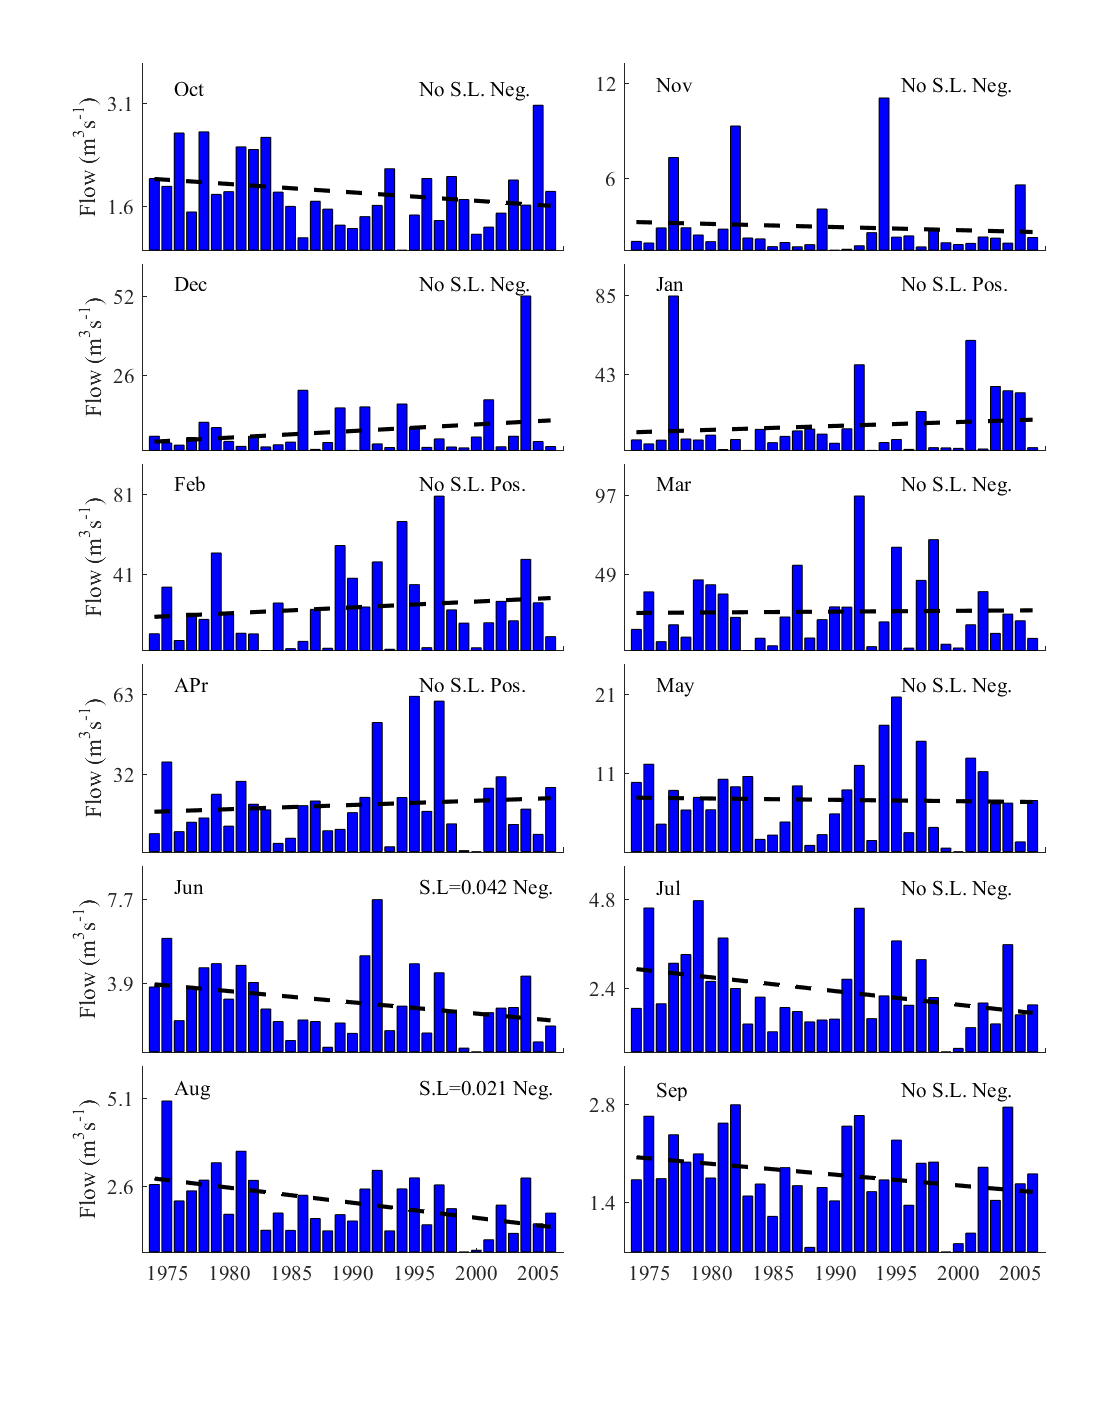


**Figure S13.** Trend of monthly flow at Bande-Bahman gauge station (no. 1 in Table S2).


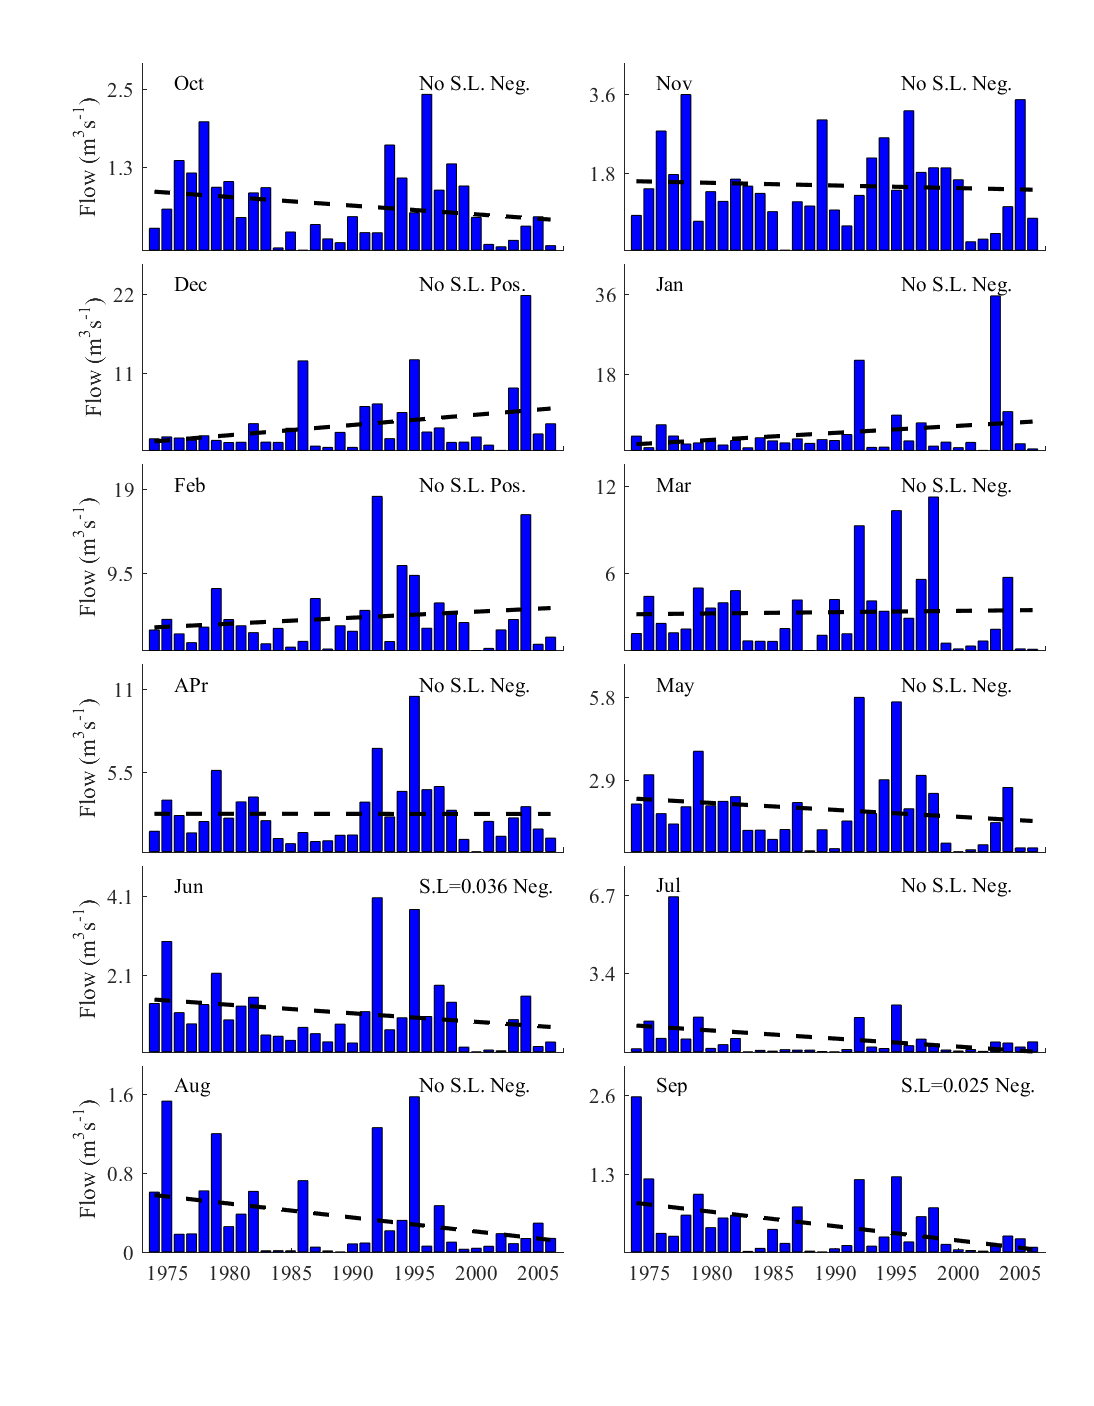


**Figure S14.** Trend of monthly flow at Barak gauge station (no. 3 in Table S2).


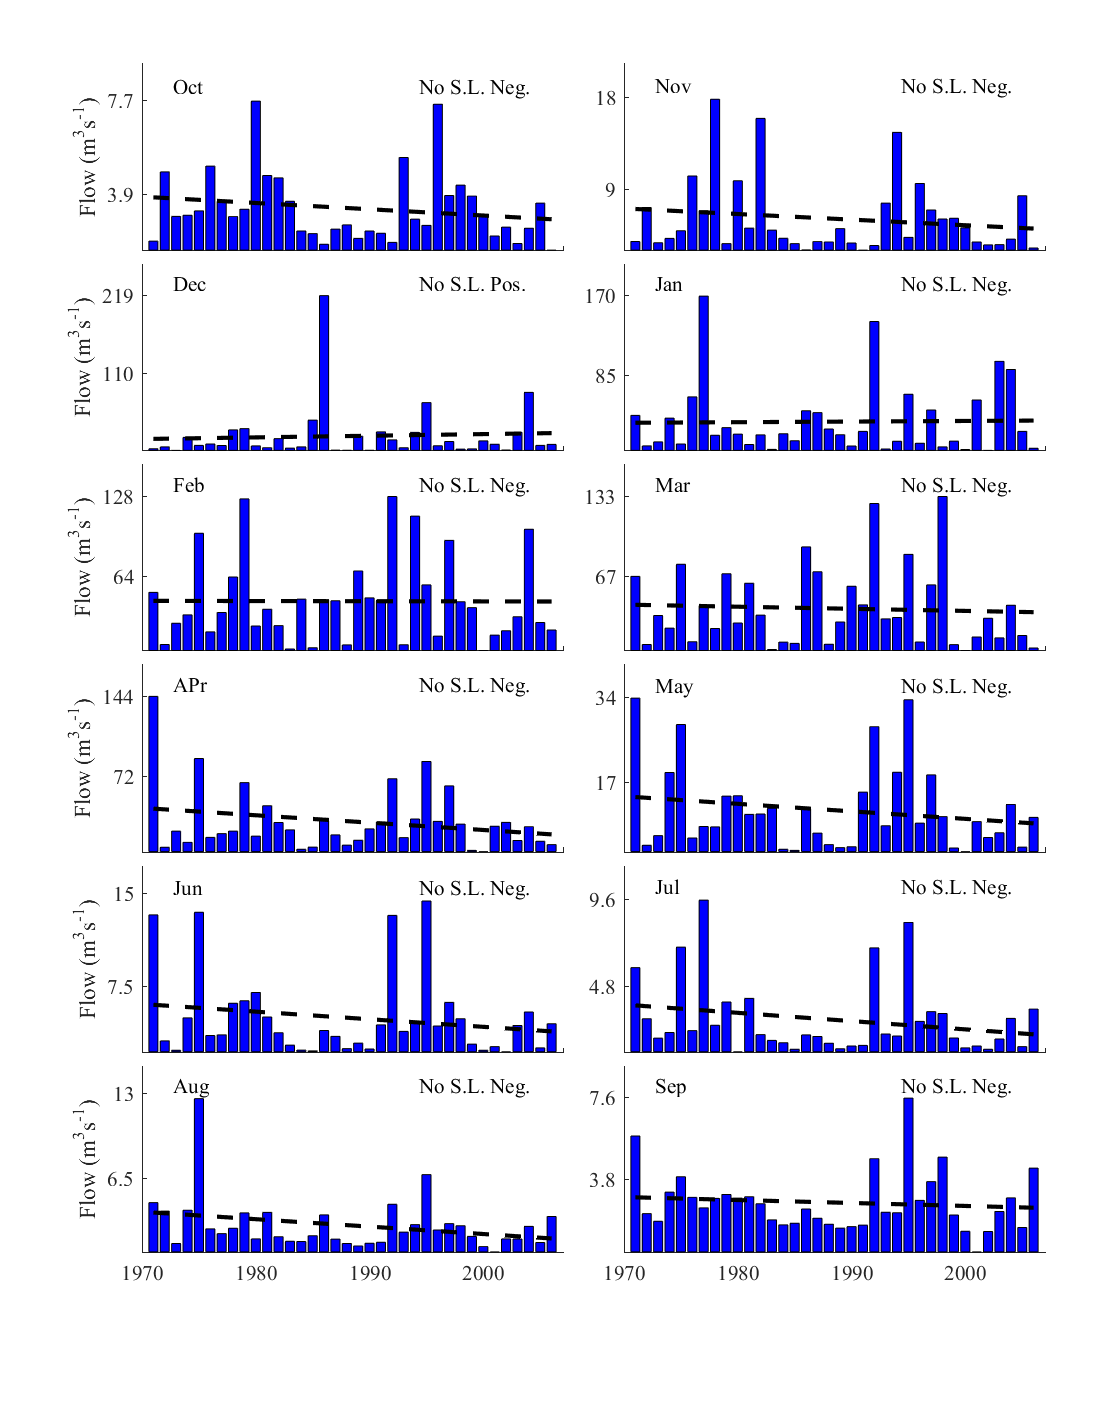


**Figure S15.** Trend of monthly flow at Karzin gauge station (no. 4 in Table S2).


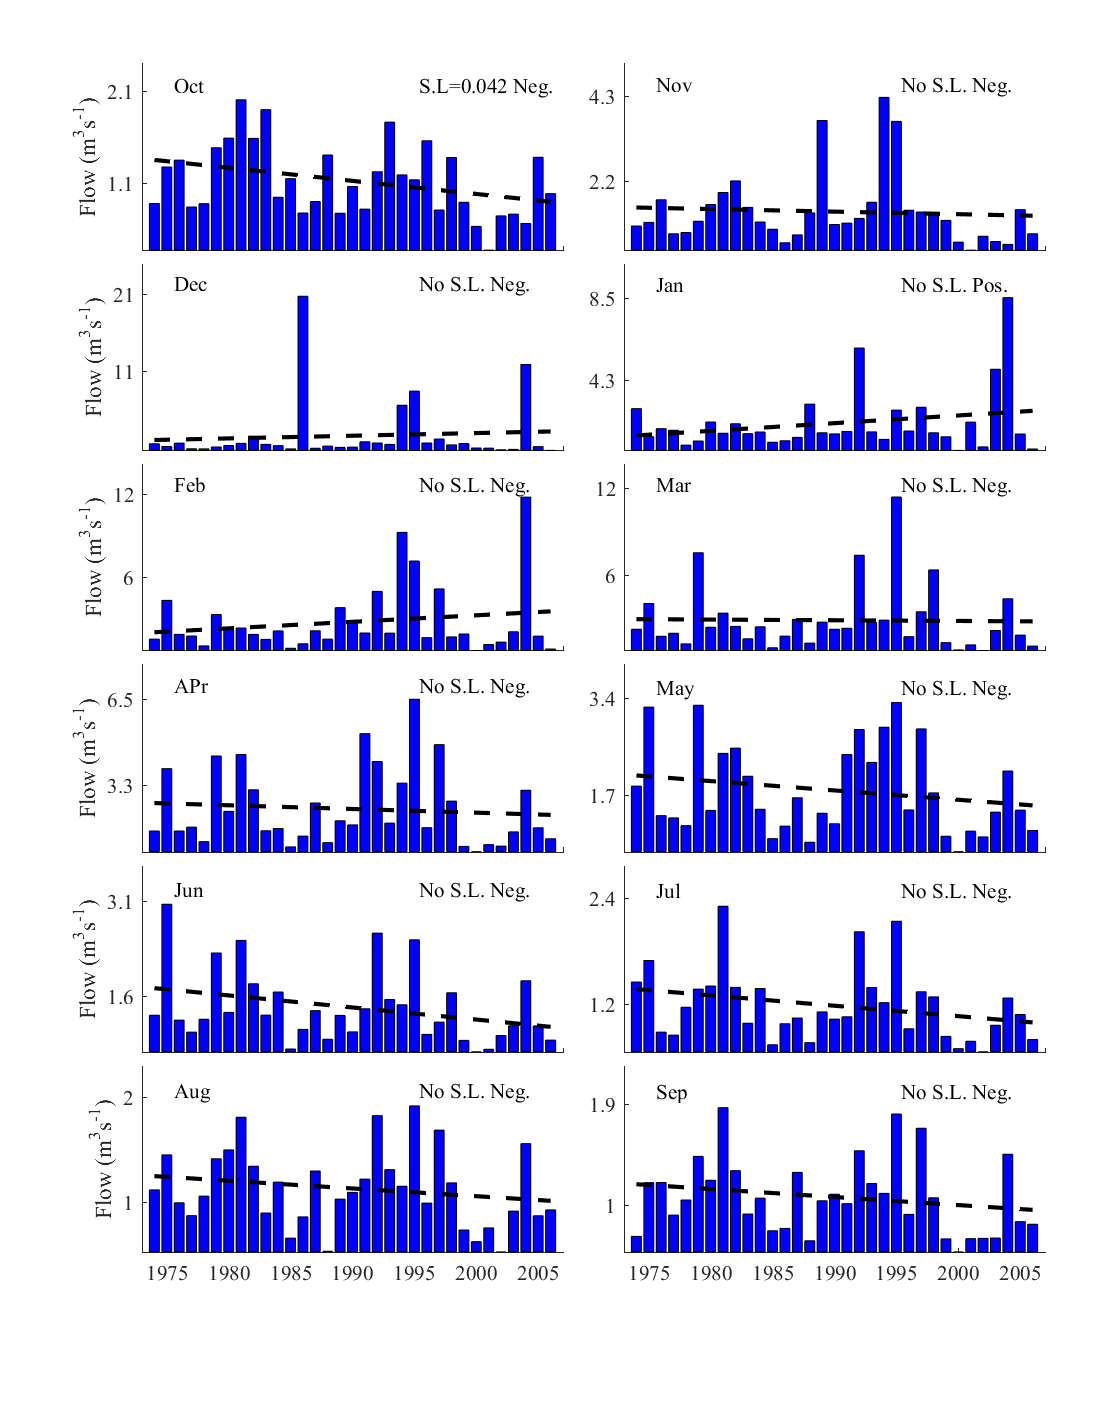


**Figure S16.** Trend of monthly flow at Hanifaghan gauge station (no. 5 in Table S2).


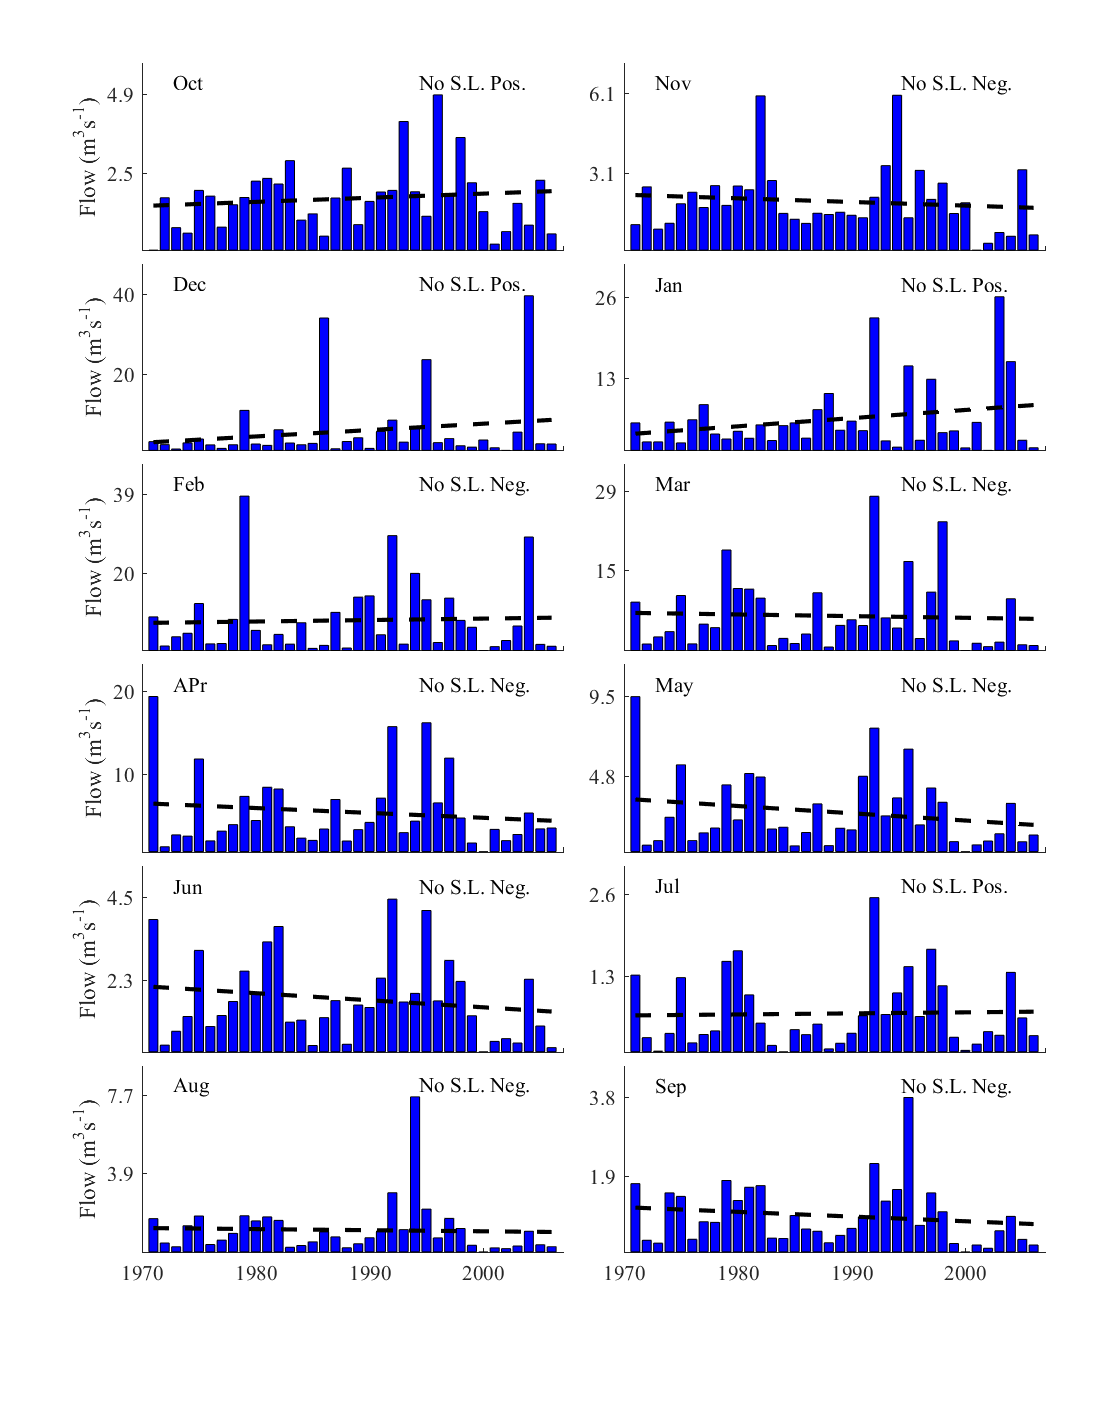


**Figure S17.** Trend of monthly flow at Tangab gauge station (no. 6 in Table S2).


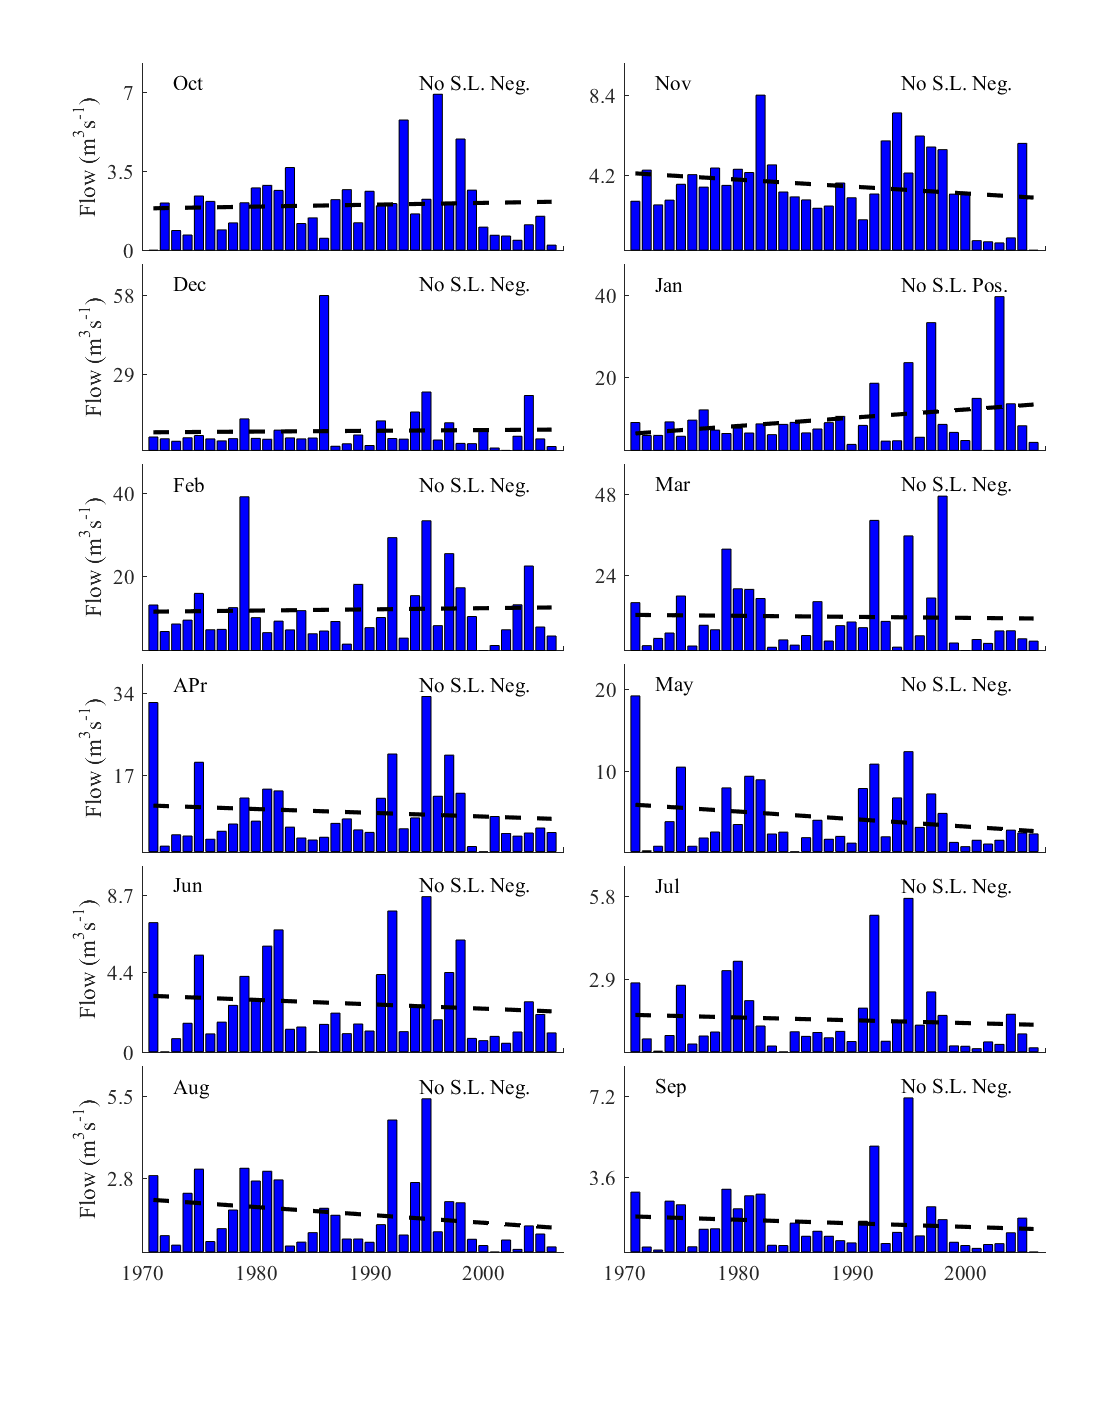


**Figure S18.** Trend of monthly flow at Tangab gauge station (no. 6 in Table S2).
